# Supplementary material for: Type I Interferon Transcriptional Network Regulates Expression of Coinhibitory Receptors in Human T cells
Source: PubMed Central journal article supplement — bioRxiv. 2020 Oct 31:2020.10.30.362947. Preprint. [Version 1] doi: 10.1101/2020.10.30.362947 (PMC7605554; doi:10.1101/2020.10.30.362947), 2020-10-31

Supplementary Figure 1

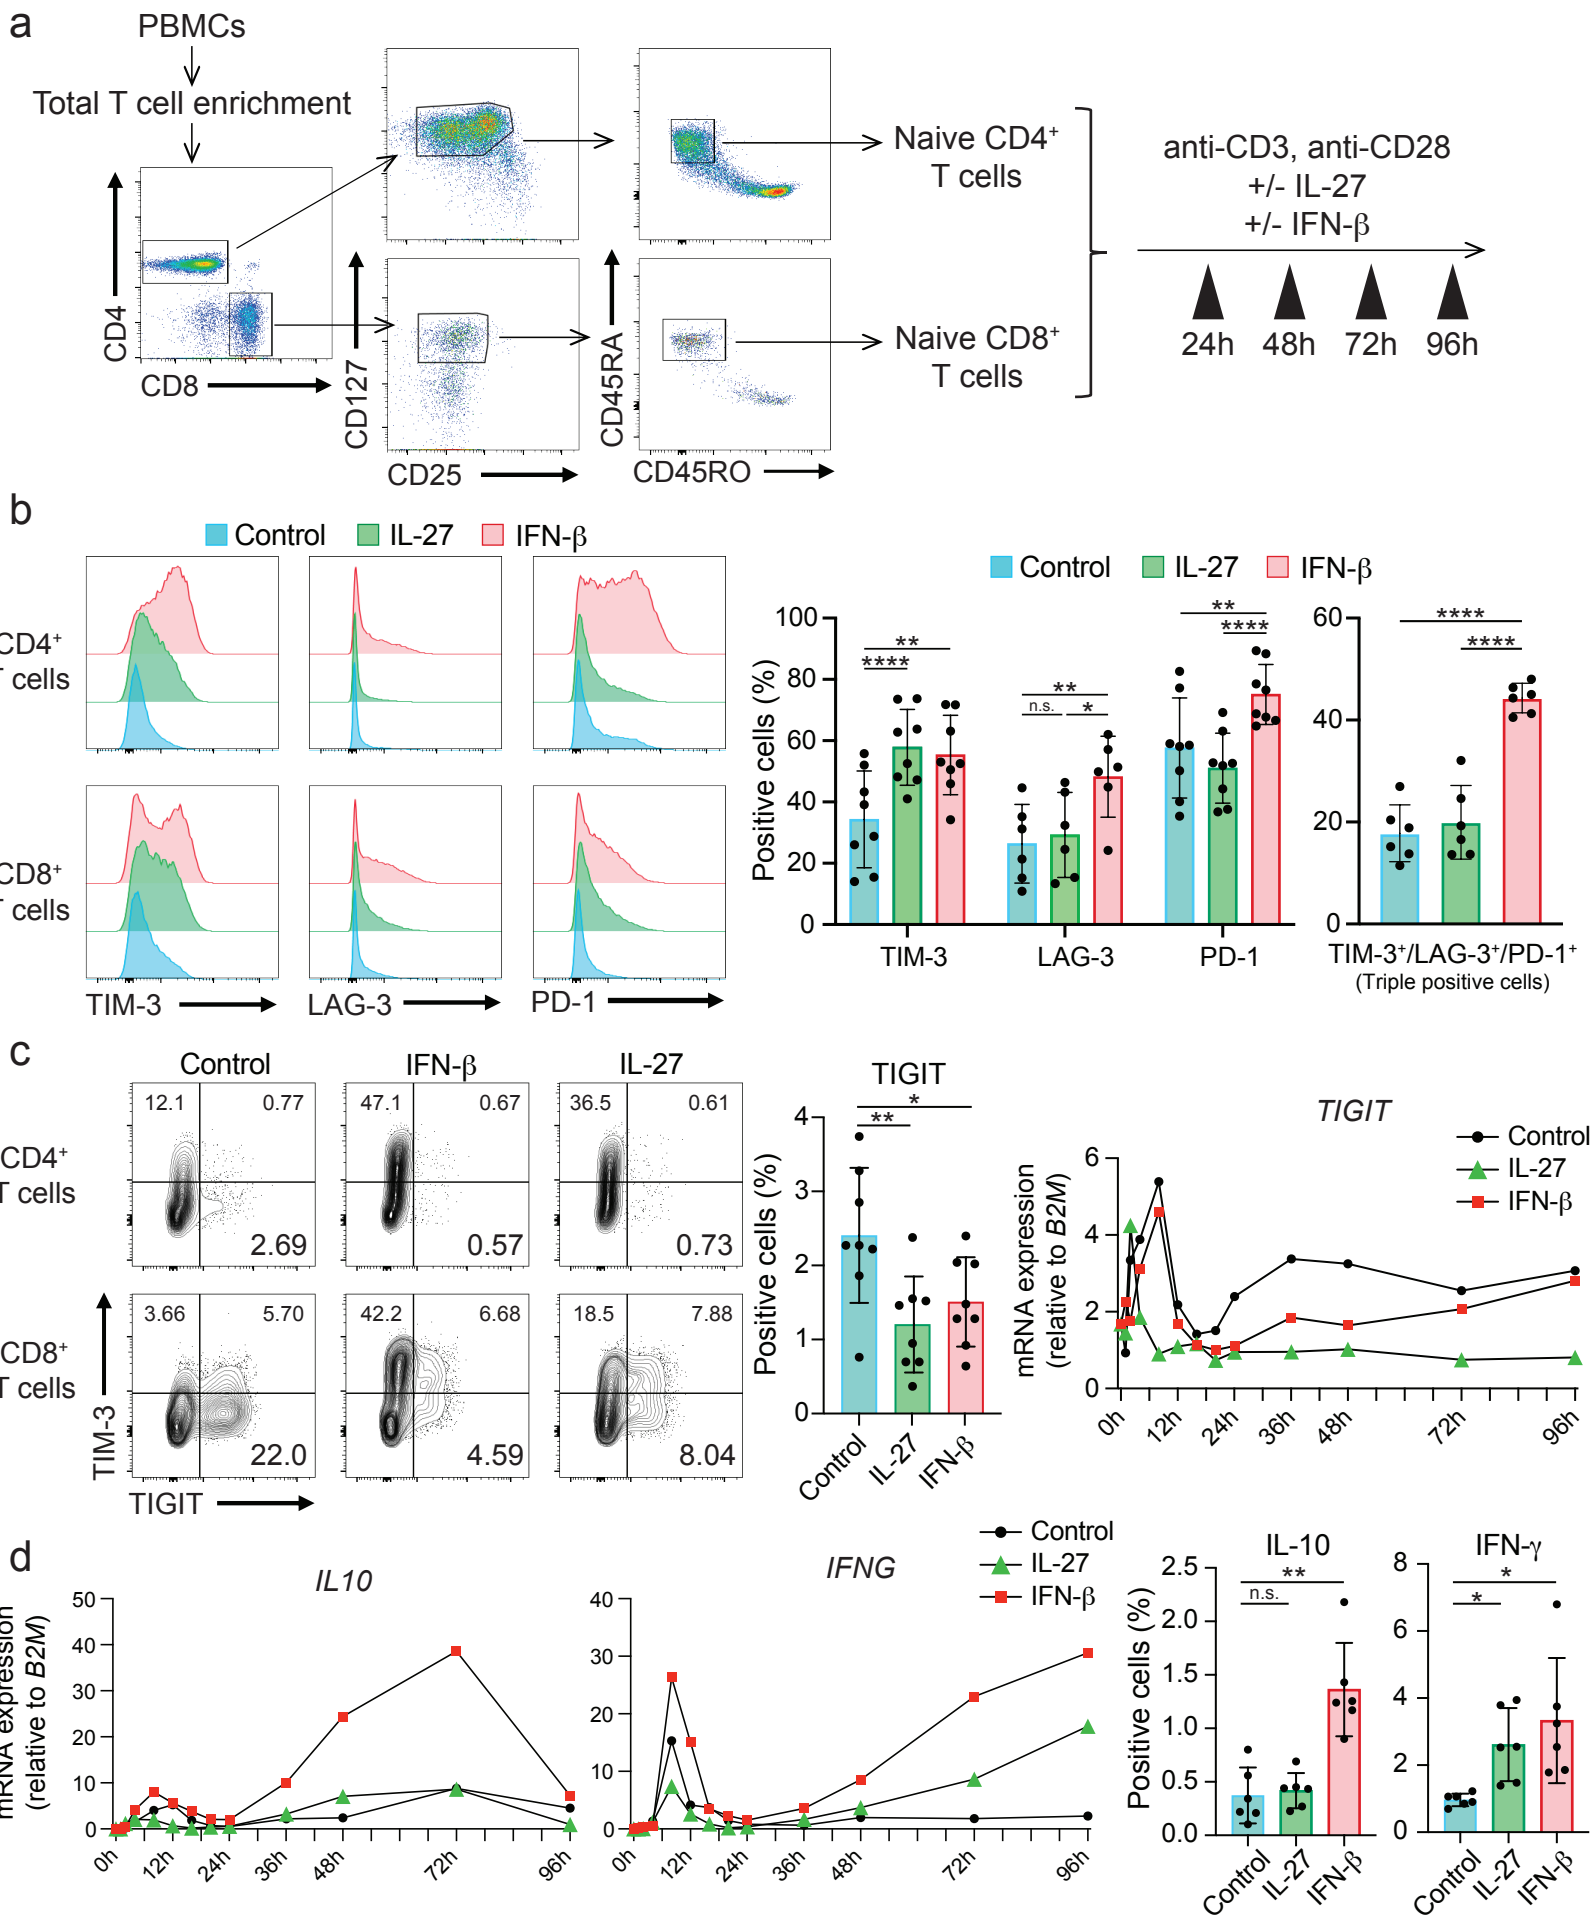

Supplementary Figure 2

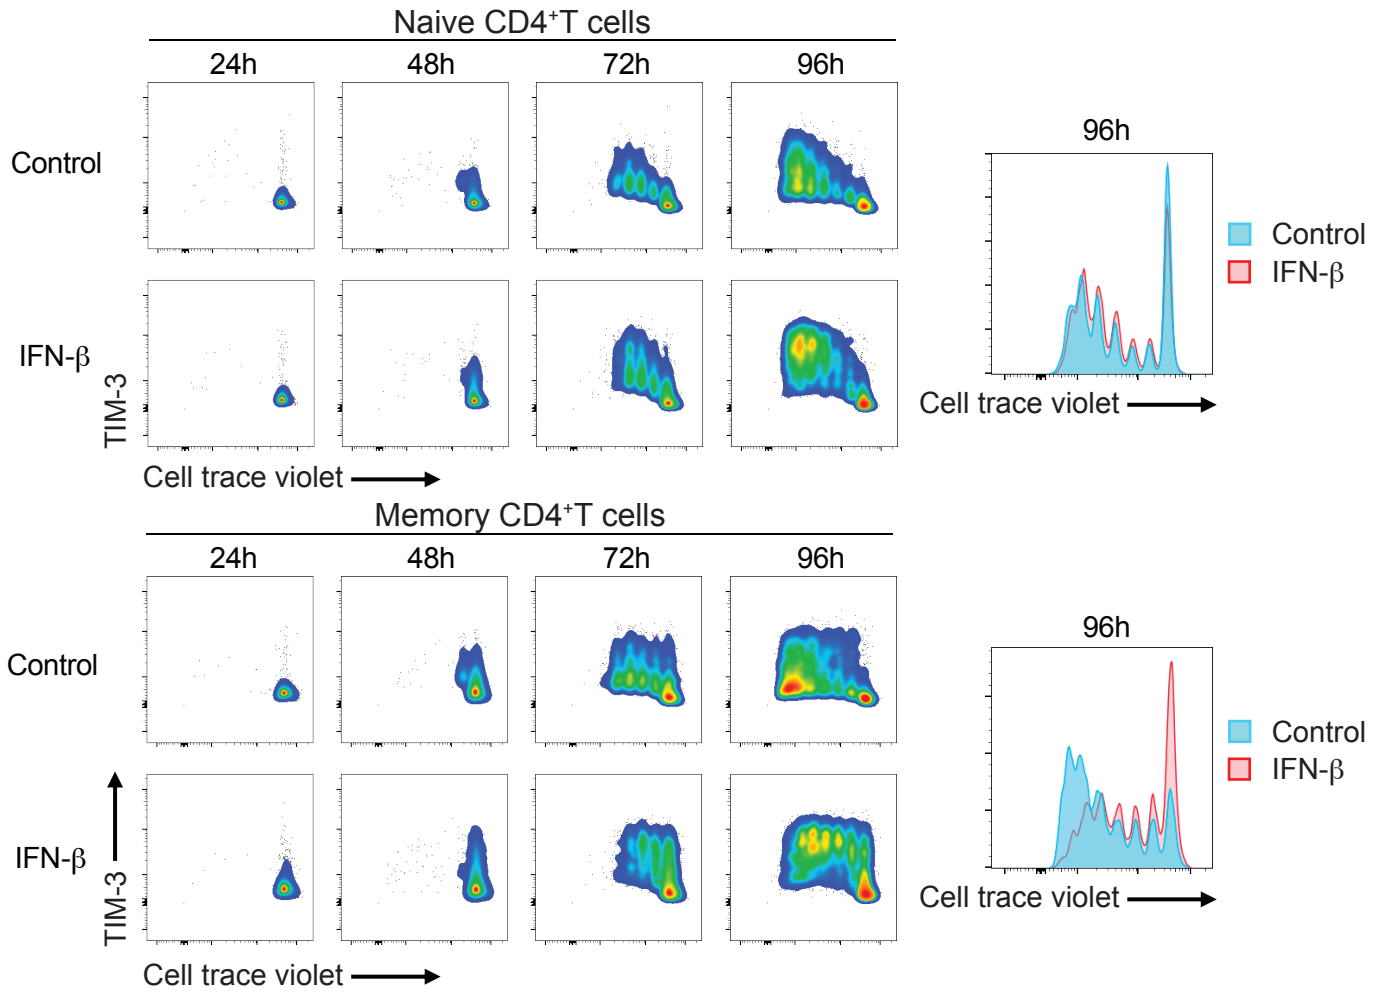

Supplementary Figure 3

**a**

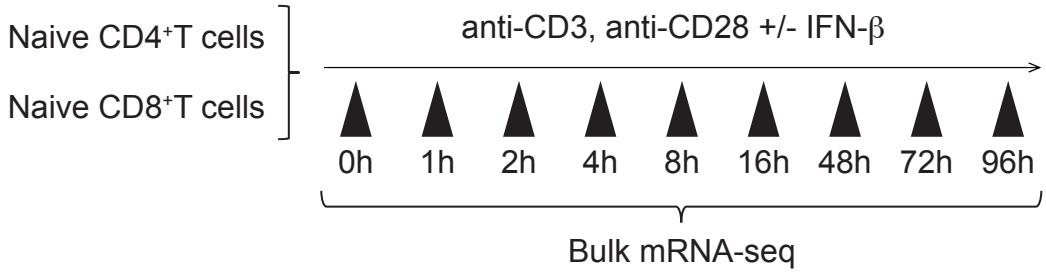

34 samples per experiment x 3 repeats = 102 libraries for mRNA-seq

**b**

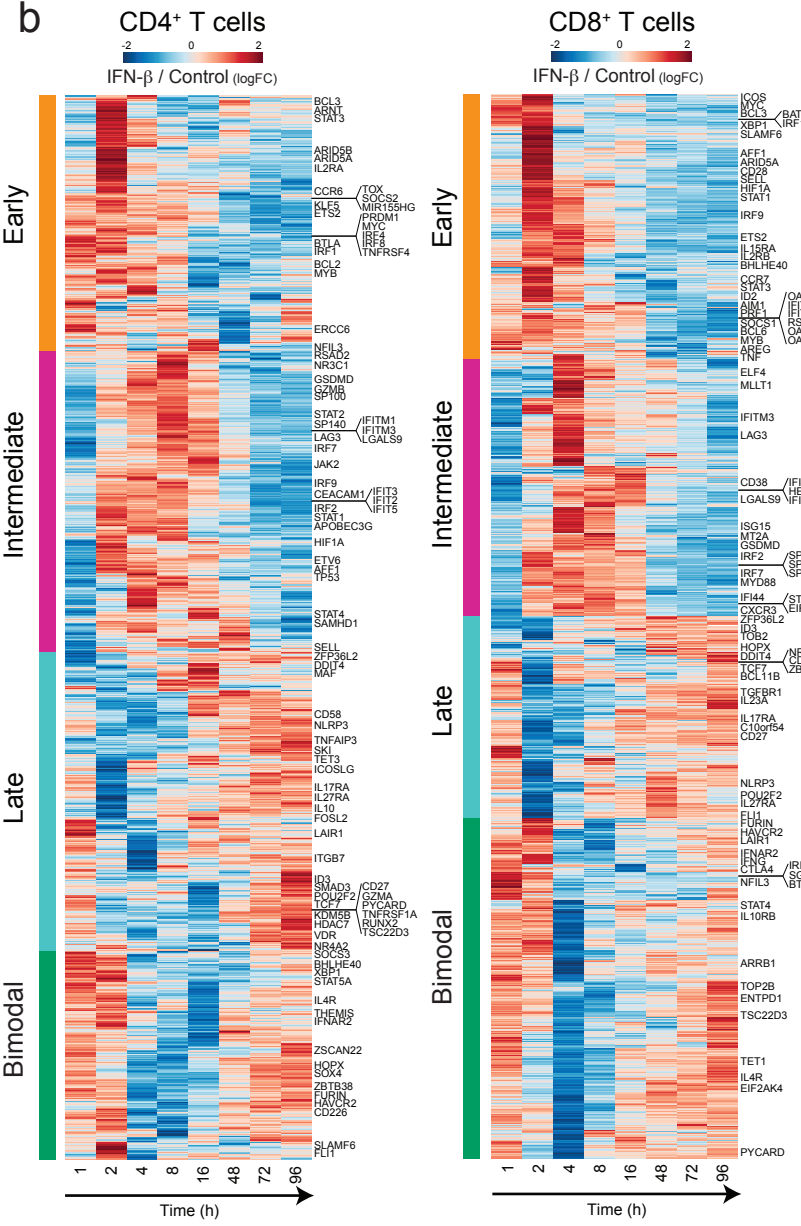

**c**

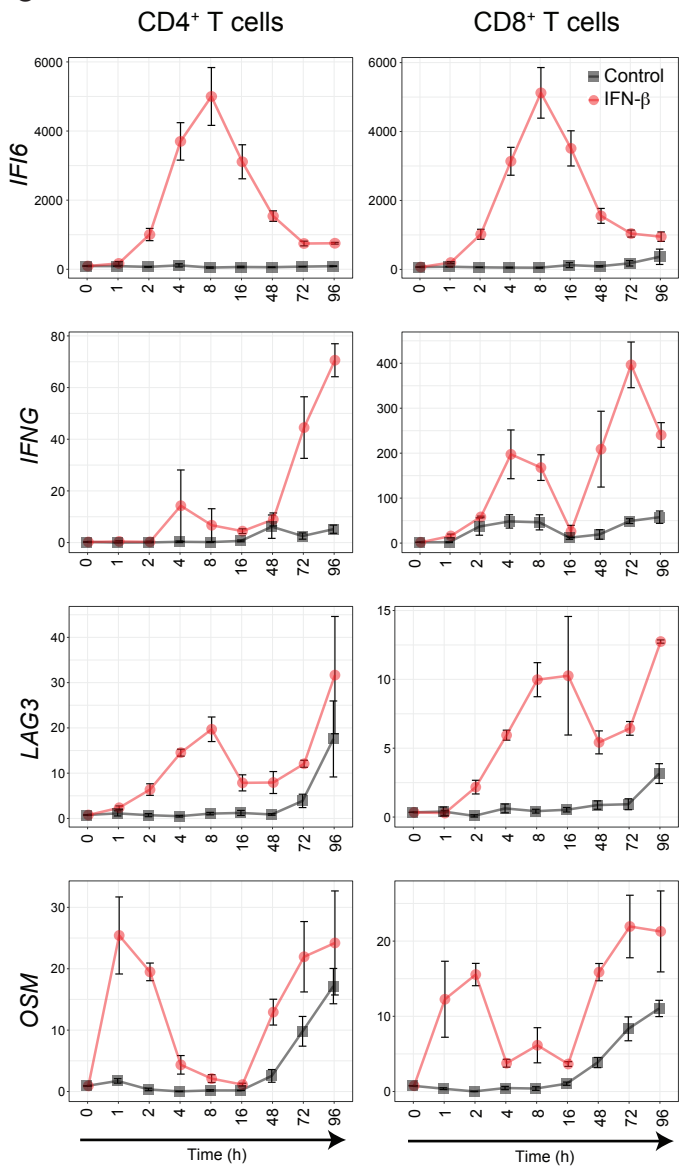

Supplementary Figure 4

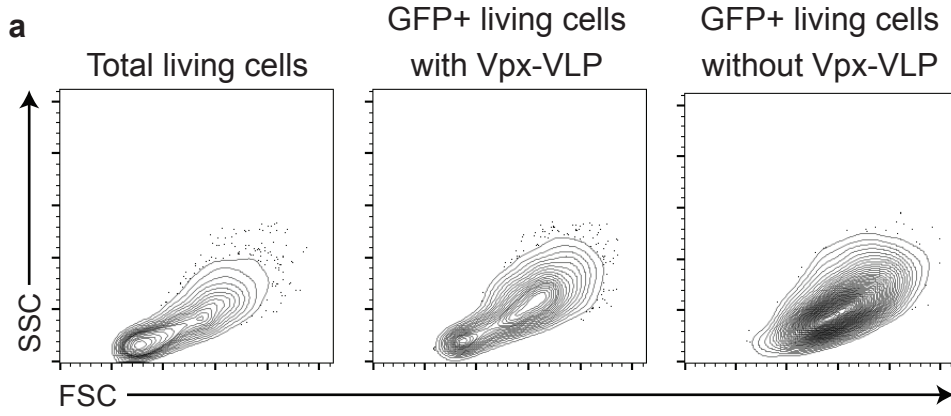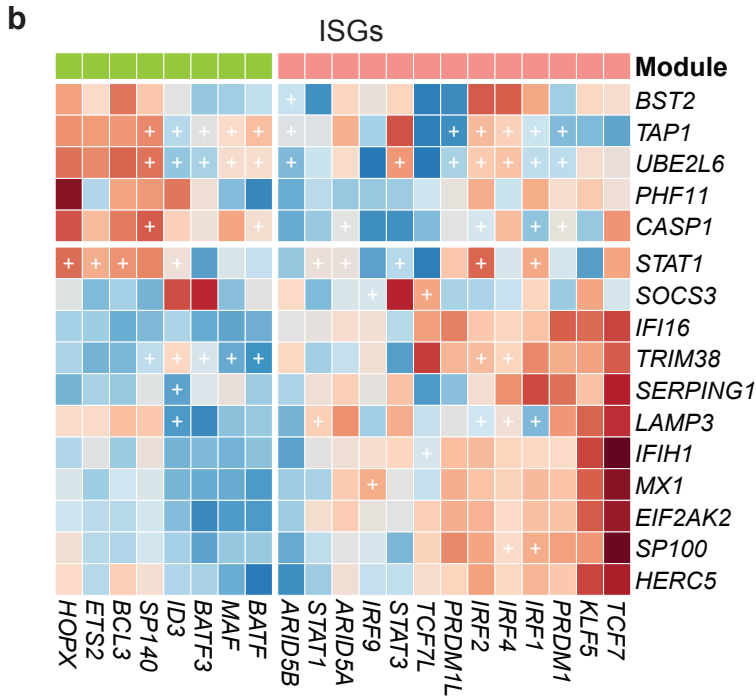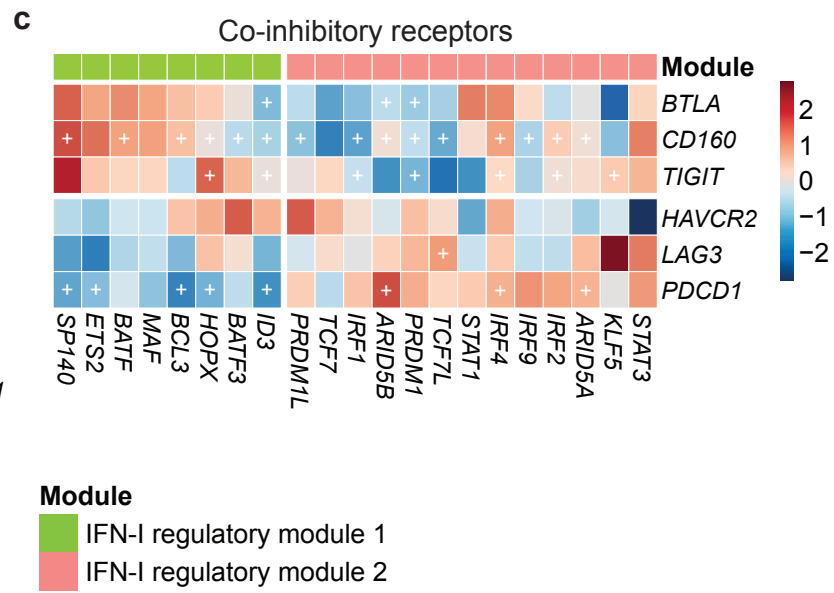



Supplementary Figure 5

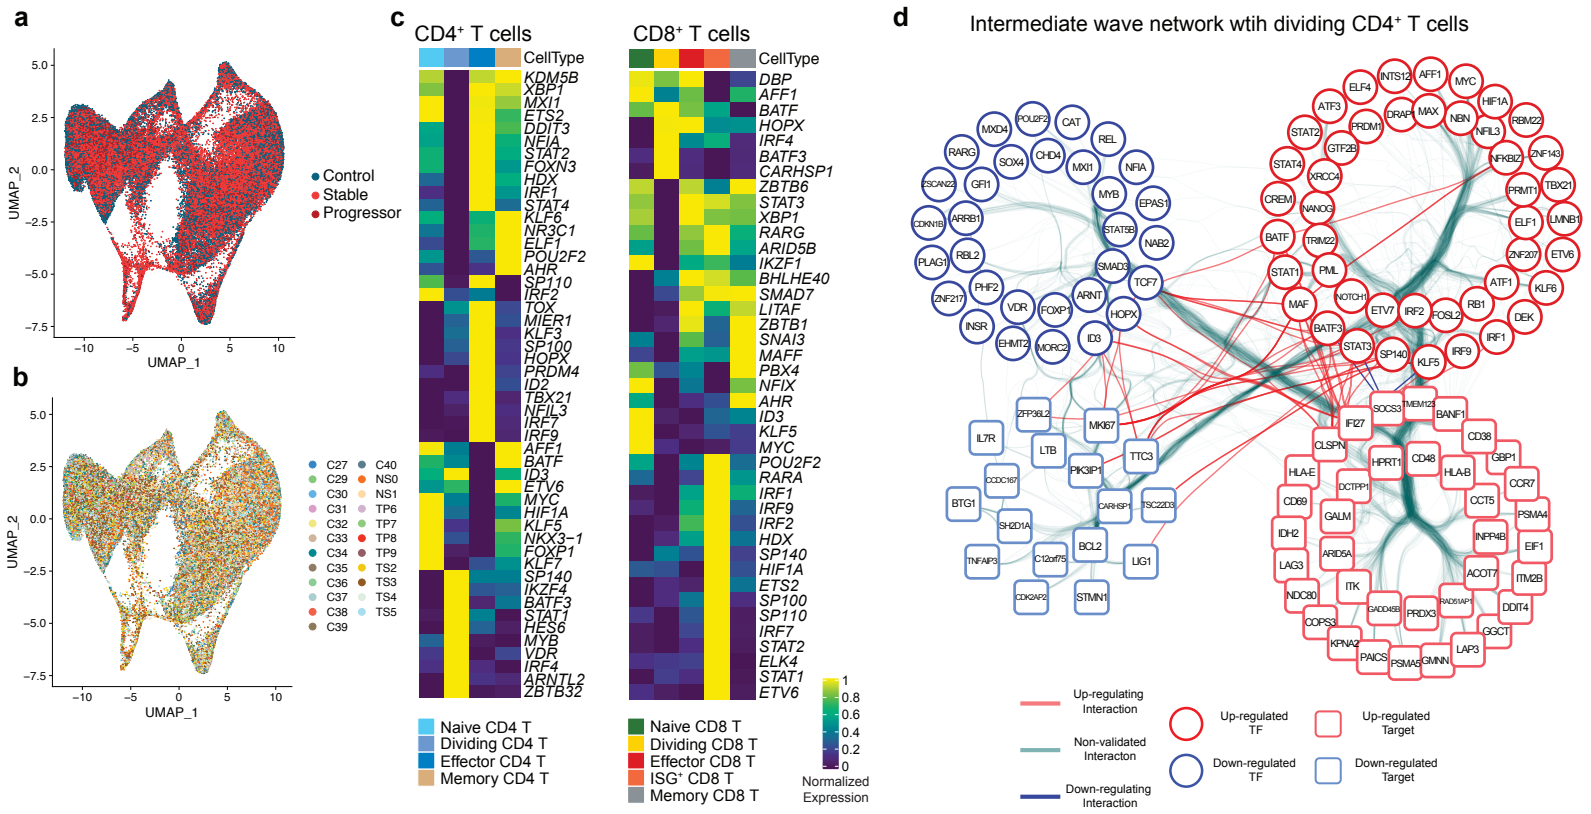

Supplement: media-1.pdf [file media-1.pdf]
